# Supplementary material for: Carbon–Nitrogen Transmutation in Polycyclic Arenol Skeletons to Access N-Heteroarenes
Source: Research Square preprint supplement (doi:10.21203/rs.3.rs-3908486/v1), 2024-02-07

## checkCIF/PLATON report

Structure factors have been supplied for datablock(s) 1\_a\_sq

THIS REPORT IS FOR GUIDANCE ONLY. IF USED AS PART OF A REVIEW PROCEDURE FOR PUBLICATION, IT SHOULD NOT REPLACE THE EXPERTISE OF AN EXPERIENCED CRYSTALLOGRAPHIC REFEREE.

No syntax errors found.      CIF dictionary      Interpreting this report

### Datablock: 1\_a\_sq

---

|                        |                                    |                          |
|------------------------|------------------------------------|--------------------------|
| Bond precision:        | C-C = 0.0087 A                     | Wavelength=1.34139       |
| Cell:                  | a=21.380 (4)<br>alpha=90           | b=7.919 (2)<br>beta=90   |
| Temperature:           | 150 K                              | c=23.029 (5)<br>gamma=90 |
|                        | Calculated                         | Reported                 |
| Volume                 | 3899.0 (15)                        | 3899.0 (15)              |
| Space group            | P n a 21                           | P n a 21                 |
| Hall group             | P 2c -2n                           | P 2c -2n                 |
| Moiety formula         | C44 H30 Ir N4, F6 P [+<br>solvent] | C44 H30 Ir N4, F6 P      |
| Sum formula            | C44 H30 F6 Ir N4 P [+<br>solvent]  | C44 H30 F6 Ir N4 P       |
| Mr                     | 951.91                             | 951.89                   |
| Dx, g cm <sup>-3</sup> | 1.622                              | 1.622                    |
| Z                      | 4                                  | 4                        |
| Mu (mm <sup>-1</sup> ) | 5.016                              | 5.016                    |
| F000                   | 1872.0                             | 1872.0                   |
| F000'                  | 1854.13                            |                          |
| h, k, lmax             |                                    | 26, 9, 28                |
| Nref                   |                                    | 7572                     |
| Tmin, Tmax             | 0.510, 0.606                       | 0.617, 0.751             |
| Tmin'                  | 0.427                              |                          |

Correction method= # Reported T Limits: Tmin=0.617 Tmax=0.751

AbsCorr = MULTII-SCAN

Data completeness=

Theta(max)= 57.032

R(reflections)= 0.0261( 6775)

wR2(reflections)=  
0.0609( 7572)

S = 1.084

Npar= 505

---

The following ALERTS were generated. Each ALERT has the format

**test-name\_ALERT\_alert-type\_alert-level.**

Click on the hyperlinks for more details of the test.

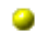

### Alert level C

|                                                                    |              |
|--------------------------------------------------------------------|--------------|
| PLAT147_ALERT_1_C s.u. on Symmetry Constrained Cell Angle(s) ..... | Please Check |
| PLAT342_ALERT_3_C Low Bond Precision on C-C Bonds .....            | 0.00874 Ang. |
| PLAT911_ALERT_3_C Missing FCF Refl Between Thmin & STh/L= 0.600    | 4 Report     |
| 4 9 0, 18 0 15, 14 0 23, 12 0 24,                                  |              |

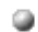

### Alert level G

|                                                                                                         |          |
|---------------------------------------------------------------------------------------------------------|----------|
| ABSMU01_ALERT_1_G Calculation of _exptl_absorpt_correction_mu<br>not performed for this radiation type. |          |
| PLAT244_ALERT_4_G Low 'Solvent' Ueq as Compared to Neighbors of                                         | P1 Check |
| PLAT605_ALERT_4_G Largest Solvent Accessible VOID in the Structure                                      | 119 A**3 |
| PLAT720_ALERT_4_G Number of Unusual/Non-Standard Labels .....                                           | 2 Note   |
| Ir01 N018                                                                                               |          |
| PLAT790_ALERT_4_G Centre of Gravity not Within Unit Cell: Resd. #                                       | 2 Note   |
| F6 P                                                                                                    |          |
| PLAT869_ALERT_4_G ALERTS Related to the Use of SQUEEZE Suppressed                                       | ! Info   |
| PLAT910_ALERT_3_G Missing # of FCF Reflection(s) Below Theta(Min).                                      | 1 Note   |
| 0 0 2,                                                                                                  |          |
| PLAT912_ALERT_4_G Missing # of FCF Reflections Above STh/L= 0.600                                       | 7 Note   |
| PLAT913_ALERT_3_G Missing # of Very Strong Reflections in FCF ....                                      | 1 Note   |
| 0 0 2,                                                                                                  |          |
| PLAT933_ALERT_2_G Number of HKL-OMIT Records in Embedded .res File                                      | 2 Note   |
| 10 0 22, 12 2 24,                                                                                       |          |
| PLAT978_ALERT_2_G Number C-C Bonds with Positive Residual Density.                                      | 3 Info   |

---

0 **ALERT level A** = Most likely a serious problem - resolve or explain  
0 **ALERT level B** = A potentially serious problem, consider carefully  
3 **ALERT level C** = Check. Ensure it is not caused by an omission or oversight  
11 **ALERT level G** = General information/check it is not something unexpected

2 ALERT type 1 CIF construction/syntax error, inconsistent or missing data  
2 ALERT type 2 Indicator that the structure model may be wrong or deficient  
4 ALERT type 3 Indicator that the structure quality may be low  
6 ALERT type 4 Improvement, methodology, query or suggestion  
0 ALERT type 5 Informative message, check

---

It is advisable to attempt to resolve as many as possible of the alerts in all categories. Often the minor alerts point to easily fixed oversights, errors and omissions in your CIF or refinement strategy, so attention to these fine details can be worthwhile. In order to resolve some of the more serious problems it may be necessary to carry out additional measurements or structure refinements. However, the purpose of your study may justify the reported deviations and the more serious of these should normally be commented upon in the discussion or experimental section of a paper or in the "special\_details" fields of the CIF. checkCIF was carefully designed to identify outliers and unusual parameters, but every test has its limitations and alerts that are not important in a particular case may appear. Conversely, the absence of alerts does not guarantee there are no aspects of the results needing attention. It is up to the individual to critically assess their own results and, if necessary, seek expert advice.

### **Publication of your CIF in IUCr journals**

A basic structural check has been run on your CIF. These basic checks will be run on all CIFs submitted for publication in IUCr journals (*Acta Crystallographica*, *Journal of Applied Crystallography*, *Journal of Synchrotron Radiation*); however, if you intend to submit to *Acta Crystallographica Section C* or *E* or *IUCrData*, you should make sure that full publication checks are run on the final version of your CIF prior to submission.

### **Publication of your CIF in other journals**

Please refer to the *Notes for Authors* of the relevant journal for any special instructions relating to CIF submission.

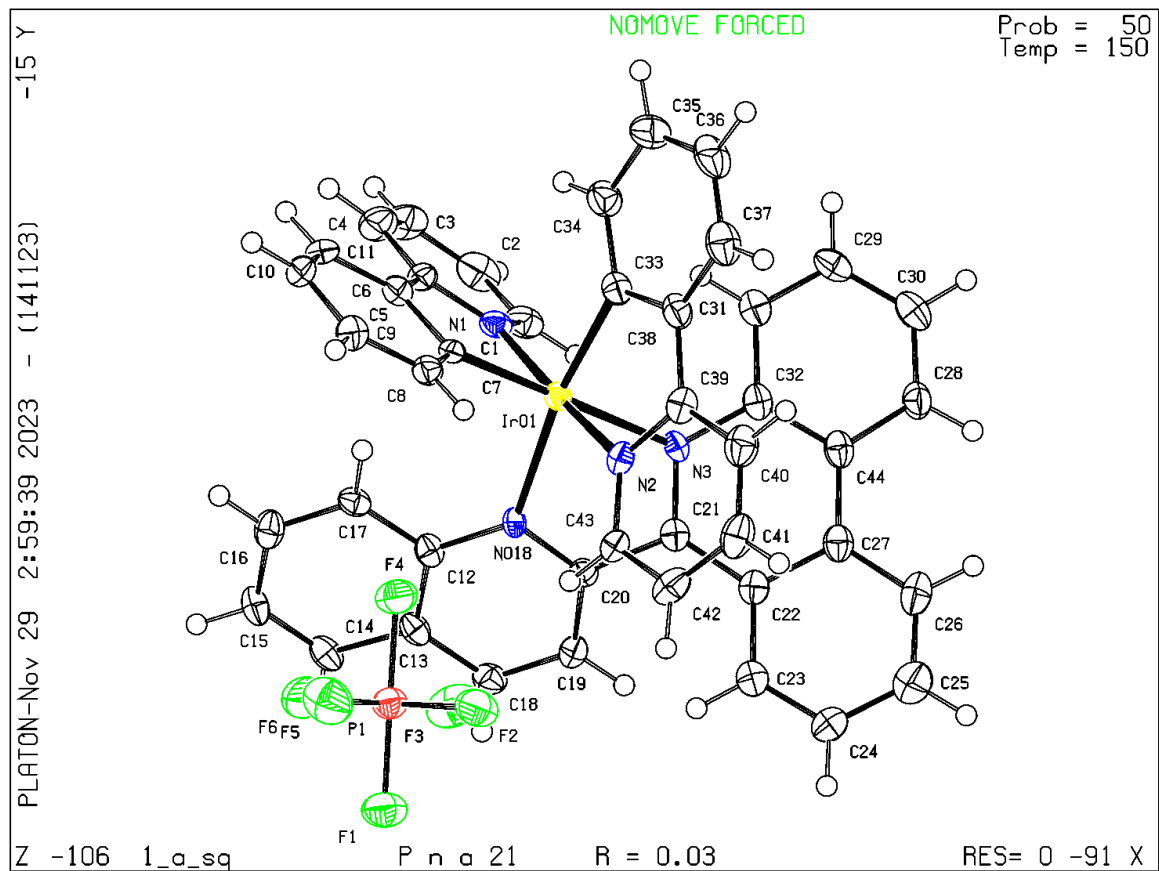

Supplement: Supplementary file 4 [file c0b3936aa0c5c35609e7b4a0.pdf]
